# Supplementary material for: Overlooked possibility of a collapsed Atlantic Meridional Overturning Circulation in warming climate
Source: PubMed Central journal article supplement — Sci Adv. 2017 Jan 4;3(1):e1601666. doi: 10.1126/sciadv.1601666 (PMC5217057; doi:10.1126/sciadv.1601666), 2017-01-04
Supplement: 1601666_SM.pdf [file 1601666_SM.pdf]

## Supplementary Materials for **Overlooked possibility of a collapsed Atlantic Meridional Overturning Circulation in warming climate**

Wei Liu, Shang-Ping Xie, Zhengyu Liu, Jiang Zhu

Published 4 January 2017, *Sci. Adv.* **3**, e1601666 (2017)

DOI: 10.1126/sciadv.1601666

### **This PDF file includes:**

- fig. S1. The depth and latitude diagram of annual mean AMOC stream function.
- fig. S2. Annual mean anomalies in double CO<sub>2</sub> simulations.
- fig. S3. Short-term (0 to 30 years) surface temperature response to CO<sub>2</sub> increase.
- fig. S4. Long-term (after 300 years) response of sea ice coverage to CO<sub>2</sub> increase.
- fig. S5. Response of the Hadley cell 300 years after CO<sub>2</sub> increase.
- fig. S6. Changes in the surface fluxes and variables over the North Atlantic in the first 30 years after CO<sub>2</sub> increase.
- fig. S7. Annual mean SST and SSS biases.
- fig. S8. Observed and simulated formation areas of NADW and Atlantic multidecadal oscillation.
- table S1. The CMIP5 models used in this study and their sponsors, countries, and names.

## Supplementary Figures

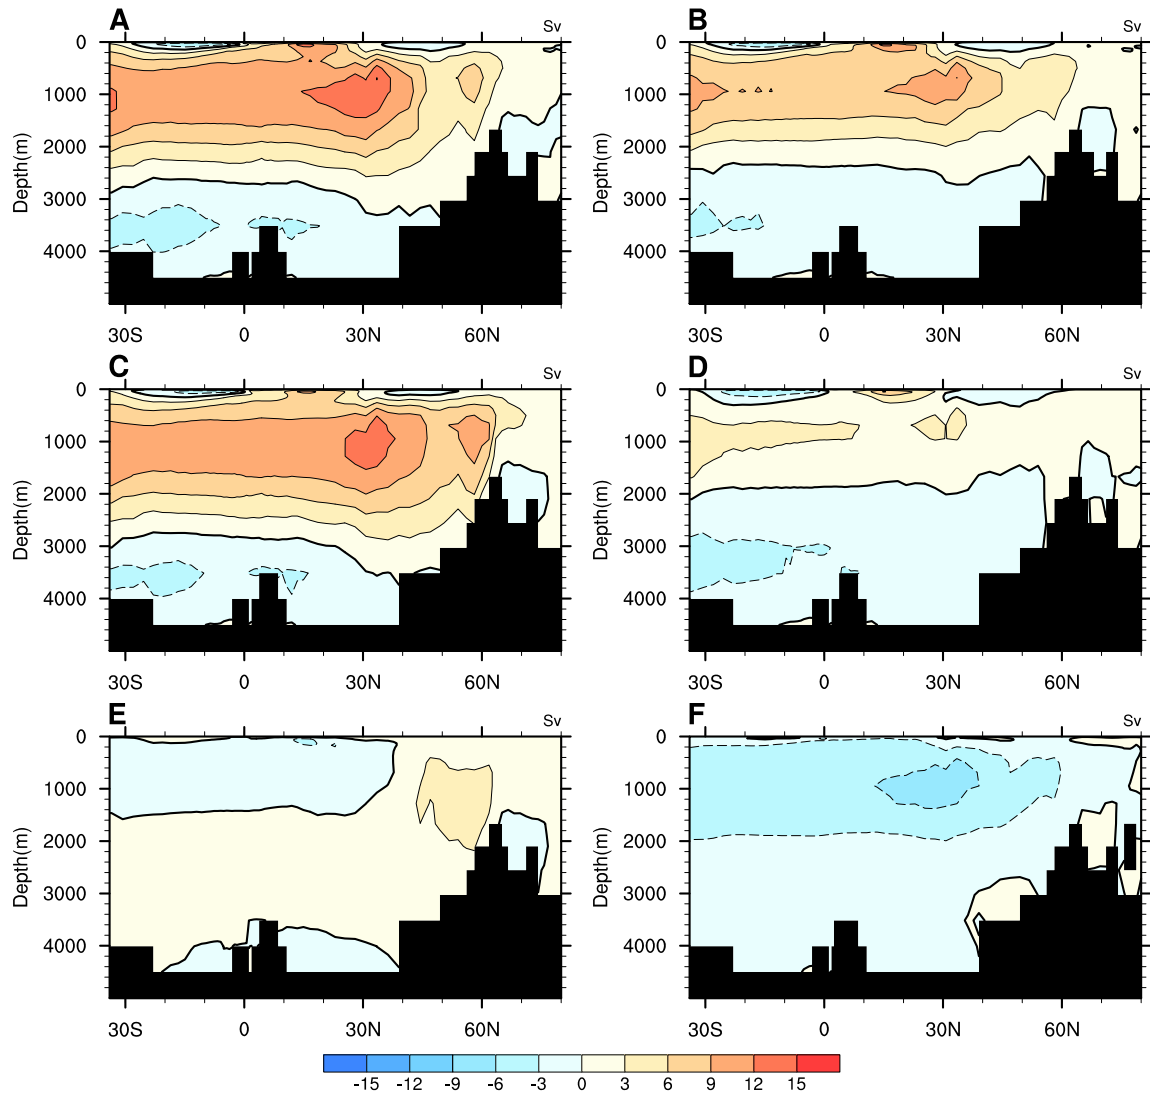

**fig. S1. The depth and latitude diagram of annual mean AMOC stream function.** (shading in Sv, 1 Sv =  $10^6\text{m}^3/\text{s}$ ) for (A) year 101-200 average in the CTL, (B) year 501-600 average in the CTLCO<sub>2</sub>, (C) year 101-200 average in the ADJ and (D) year 501-600 average in the ADJCO<sub>2</sub>. Panels (E) and (F) show the difference between (C) and (A) and between (D) and (B), respectively.

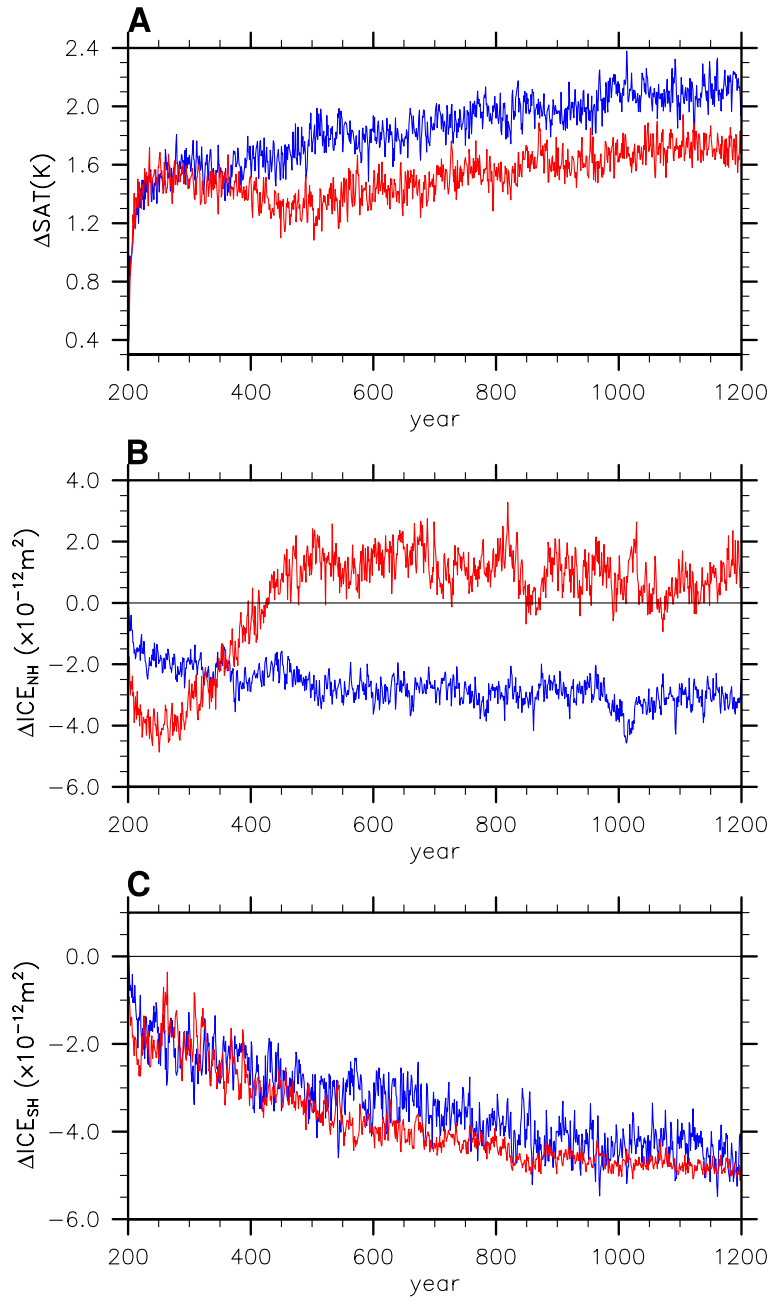

**fig. S2. Annual mean anomalies in double CO<sub>2</sub> simulations.** (relative to the climatology in the CTL or ADJ) for (A) global mean surface air temperature and sea ice area in the (B) Northern Hemisphere and (C) Southern Hemisphere in the CTLCO<sub>2</sub> (blue) and ADJCO<sub>2</sub> (red).

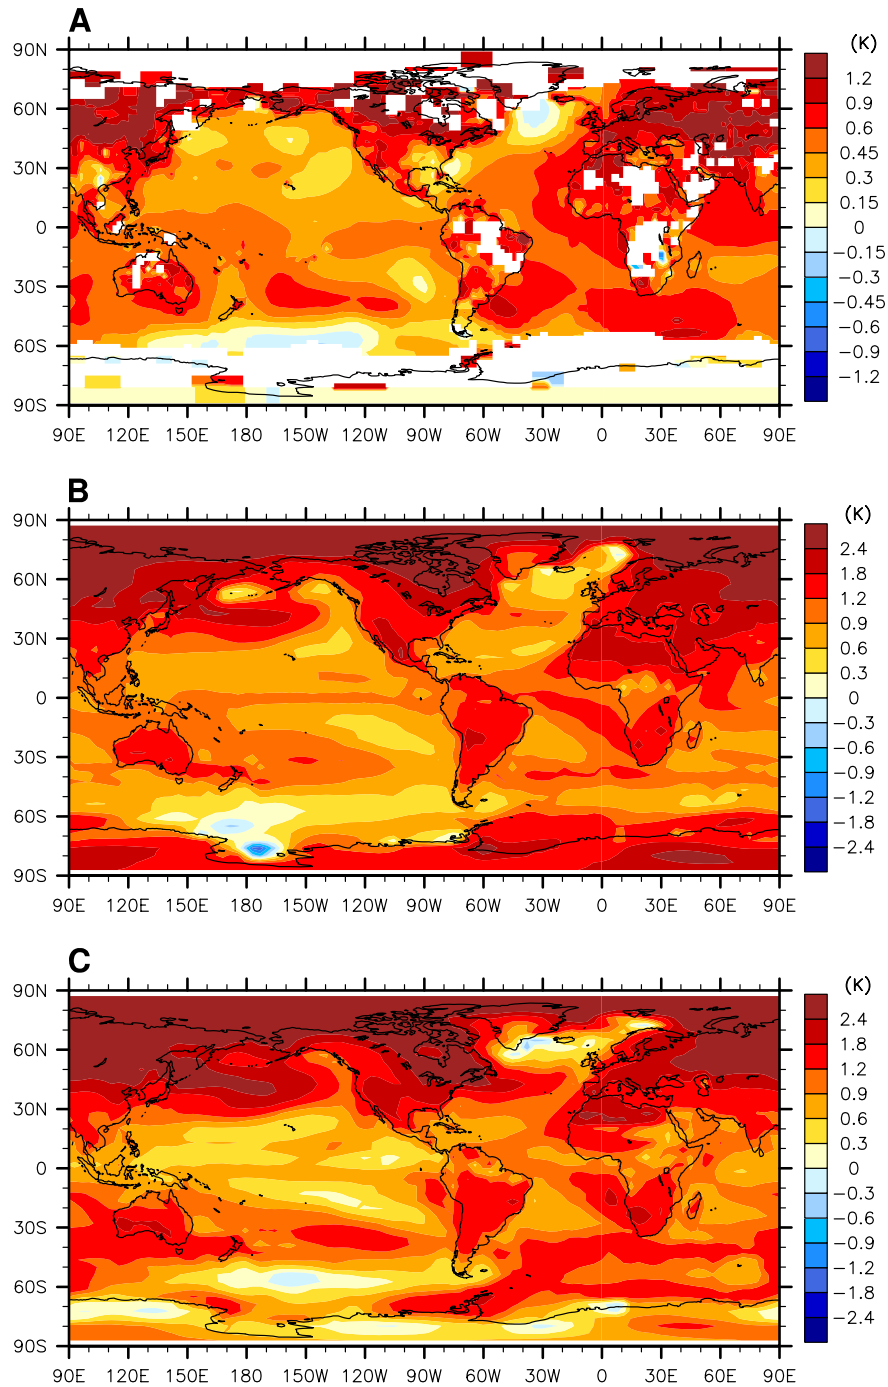

**fig. S3. Short-term (0 to 30 years) surface temperature response to CO<sub>2</sub> increase. (A)**

The annual mean temperature difference from the GISTEMP (39) between 1990-2014 and 1880-1989 (shading in K). **(B)** The annual mean temperature change during the first three decades in the CTLCO<sub>2</sub> (shading in K). **(C)** Similar to (b) but for the change in the ADJCO<sub>2</sub>.

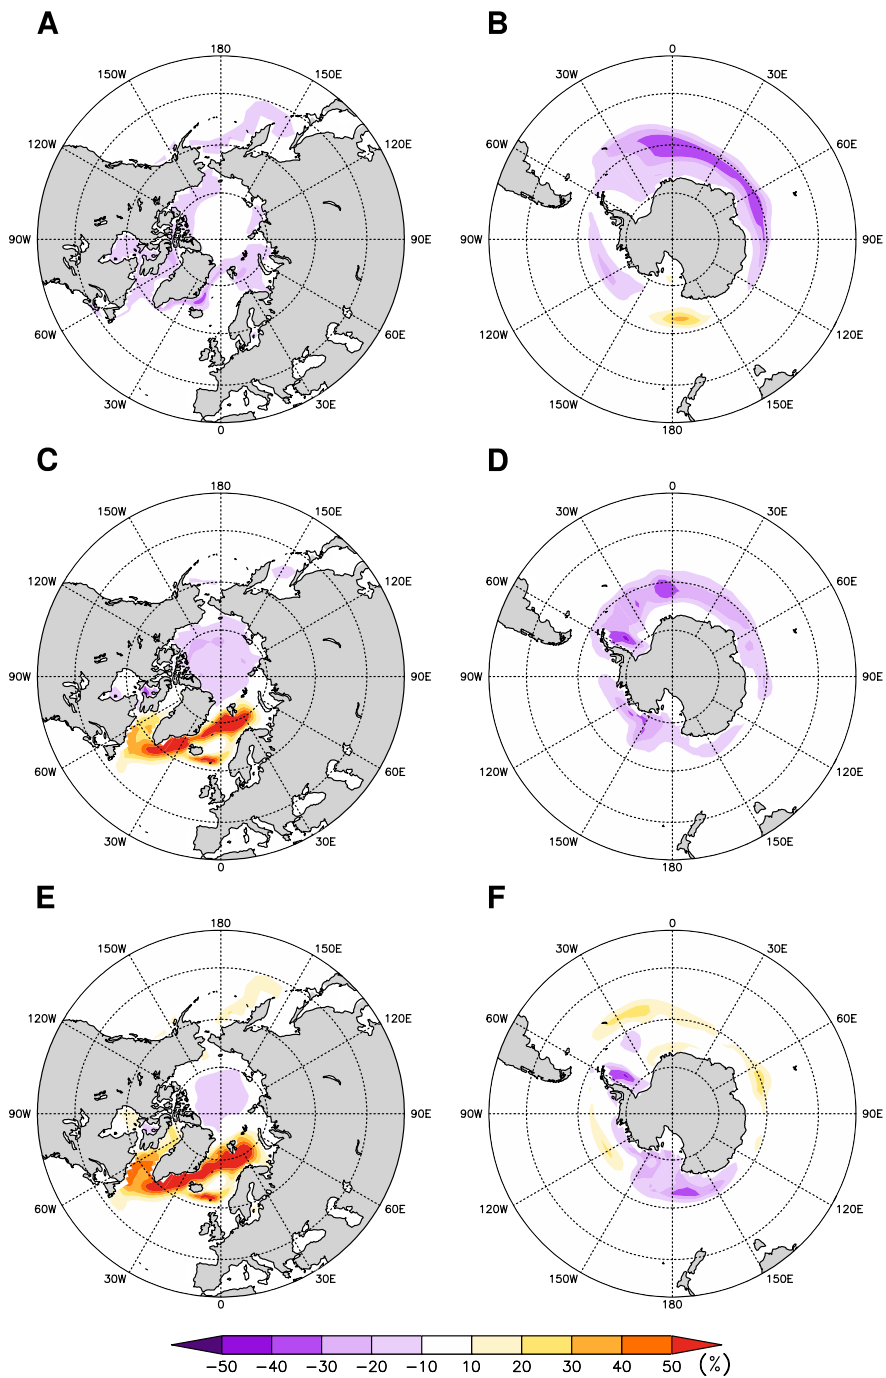

**fig. S4. Long-term (after 300 years) response of sea ice coverage to CO<sub>2</sub> increase.** Left column shows annual mean sea ice converge in the Northern Hemisphere (shading in percentage): (A) the CTLCO<sub>2</sub> minus the CTL, (C) the ADJCO<sub>2</sub> minus the ADJ, and (E) the difference between (C) and (A). Right column is similar to left column but for the results in the Southern Hemisphere.

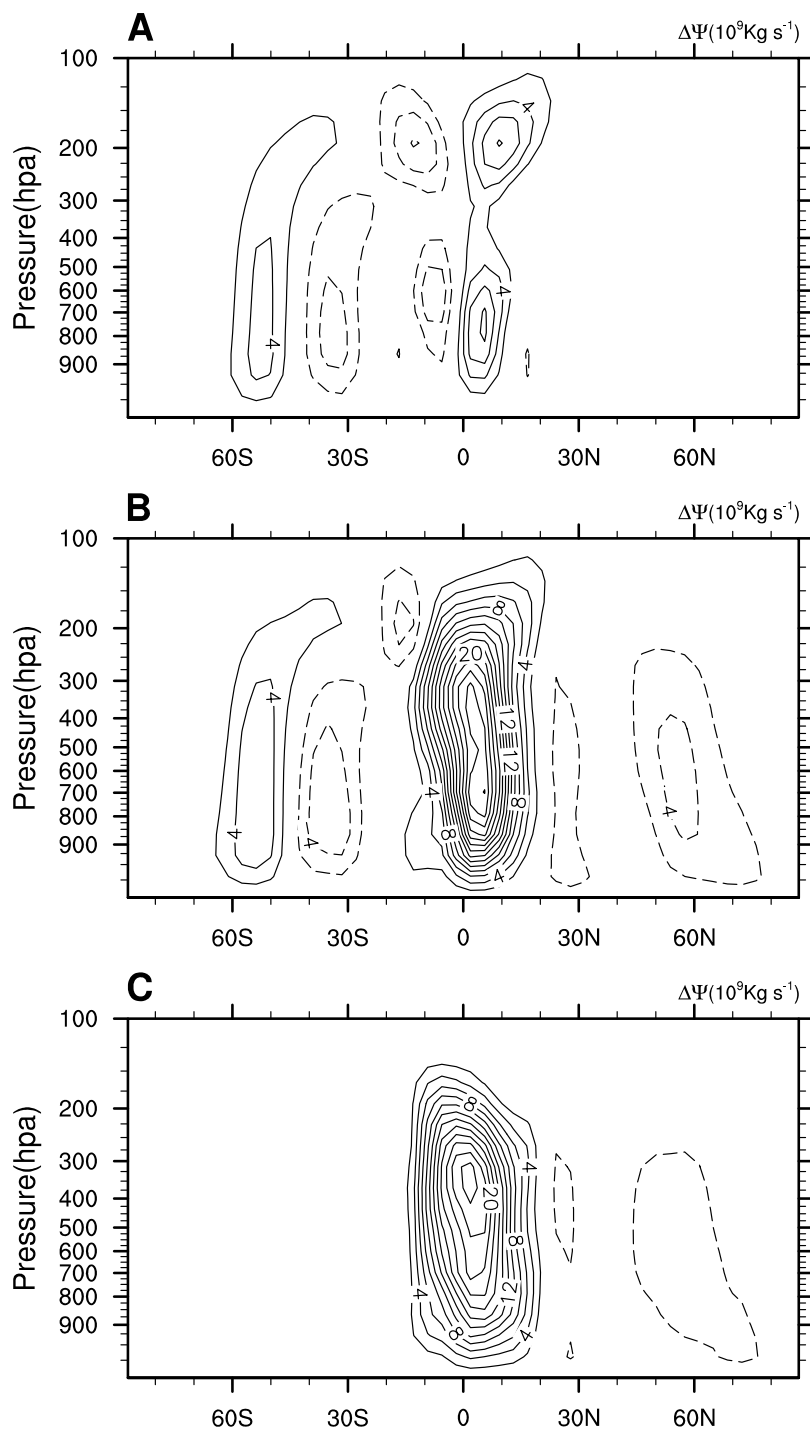

**fig. S5. Response of the Hadley cell 300 years after CO<sub>2</sub> increase.** The altitude and latitude diagram of annual mean atmospheric mass stream-function (contour in  $10^9 \text{Kg s}^{-1}$ ) for (A) the CTLCO<sub>2</sub> minus the CTL (B) the ADJCO<sub>2</sub> minus the ADJ and (C) the difference between (B) and (A).

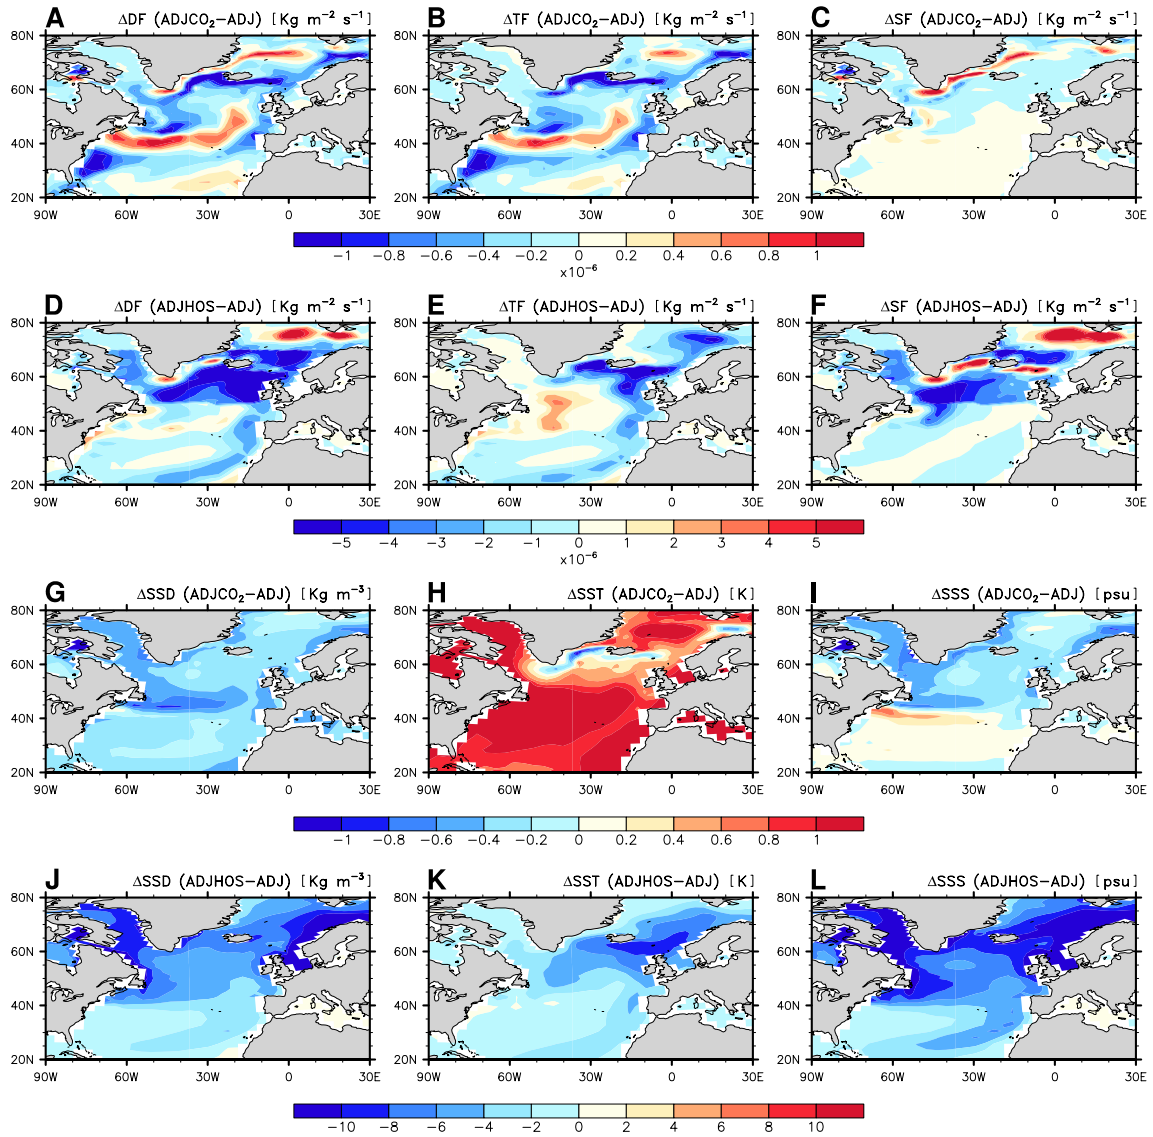

**fig. S6. Changes in the surface fluxes and variables over the North Atlantic in the first 30 years after CO<sub>2</sub> increase.** The top panel shows the change of (A) density flux (DF) and (B) thermal (TF) and (C) haline (SF) contributions (shading in  $\text{Kg m}^{-2} \text{s}^{-1}$ ) in the double CO<sub>2</sub> experiment (the ADJCO<sub>2</sub> minus the ADJ). The second panel is similar to the top panel but for the results from the hosing experiment (14) (the ADJHOS minus the ADJ). The third panel is similar to the top panel but for the change of sea surface (G) density (shading in  $\text{Kg m}^{-3}$ ), (H) temperature (shading in K) and (I) salinity (shading in psu). The bottom panel is similar to the third panel but for the results from the hosing experiment.

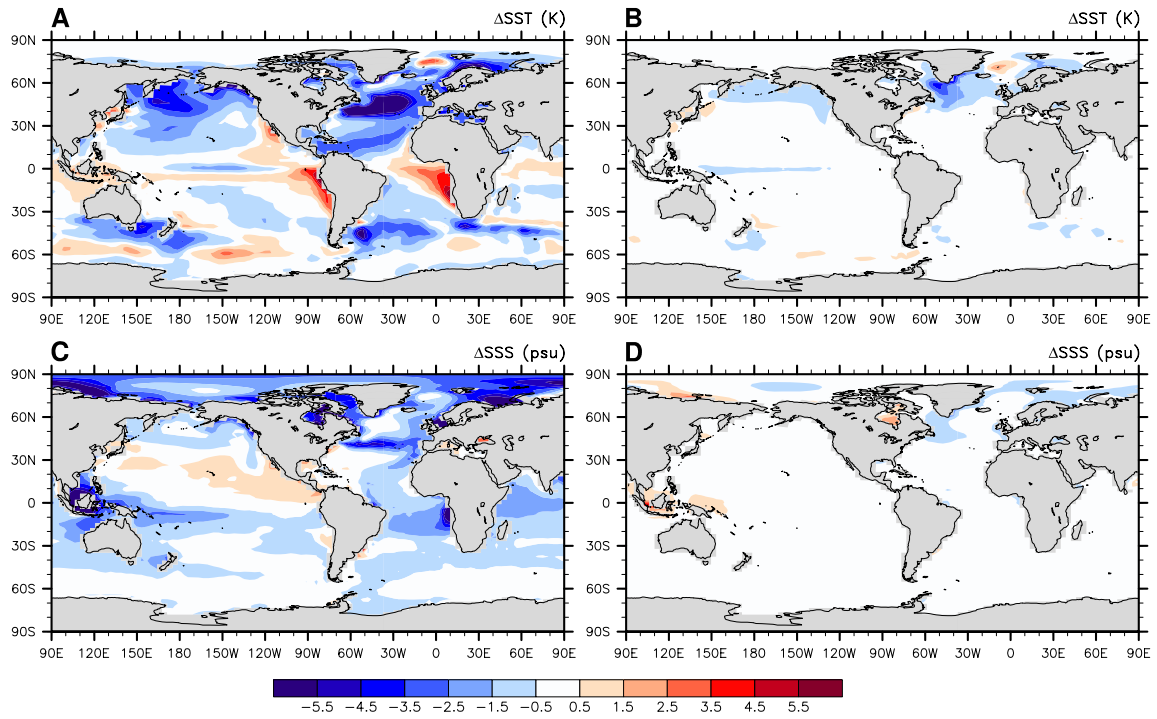

**fig. S7. Annual mean SST and SSS biases.** Panels (A) and (C) show the results from the CTL, and panels (B) and (D) show the results from the ADJ.



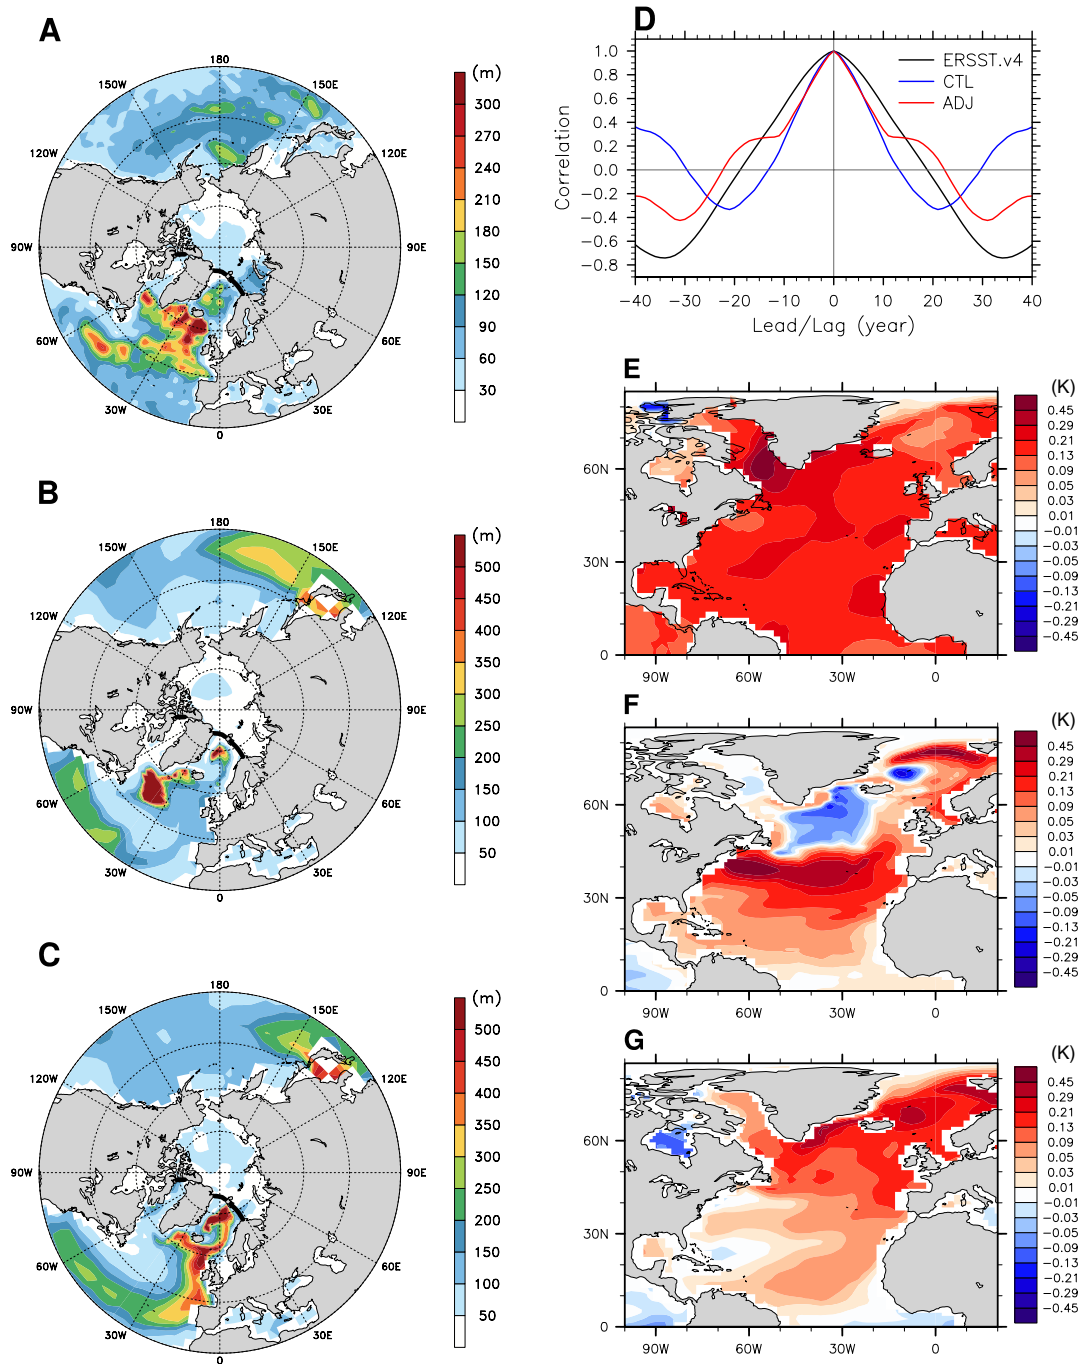

**fig. S8. Observed and simulated formation areas of NADW and Atlantic multidecadal oscillation.** The formation areas of NADW are estimated as the sites of deep mixed layer in boreal winter in the northern North Atlantic. Left column shows March mixed layer depth (shading in m) in (A) observation (MIMOC) (38), (B) the CTL and (C) the ADJ. The northern boundary of the Atlantic is denoted by thickened black

curves. Right column shows observed and simulated AMO in modern climate. **(D)** Autocorrelation of the Atlantic multidecadal oscillation (AMO) index in observation (ERSST.v4 (36, 37), black), the CTL (blue) and the ADJ (red) with lags from -40 to 40 years. **(E)-(G)** Regression of the North Atlantic SST on the normalized AMO index (shading in K) for (E) observation (ERSST.v4), (F) the CTL and (G) the ADJ.

## Supplementary Table

**table S1. The CMIP5 models used in this study and their sponsors, countries, and names.**

| <b>Sponsor, Country</b>                                                                                                                                                 | <b>Model Name</b> |
|-------------------------------------------------------------------------------------------------------------------------------------------------------------------------|-------------------|
| Commonwealth Scientific and Industrial Research Organisation (CSIRO), Australia                                                                                         | ACCESS1.3         |
| Beijing Climate Center (BCC), China                                                                                                                                     | bcc-csm-1-1       |
|                                                                                                                                                                         | bcc-csm-1-1-m     |
| Canadian Center for Climate Modeling and Analysis, Canada                                                                                                               | CanESM2           |
| National Center for Atmospheric Research (NCAR), USA                                                                                                                    | CCSM4             |
|                                                                                                                                                                         | CESM1-BGC         |
|                                                                                                                                                                         | CESM1-CAM5        |
|                                                                                                                                                                         | CESM1-FASTCHEM    |
|                                                                                                                                                                         | CESM1-WACCM       |
| Météo-France/Centre National de Recherches Météorologiques, France                                                                                                      | CNRM-CM5          |
| National Oceanic and Atmospheric Administration (NOAA)/Geophysical Fluid Dynamics Laboratory (GFDL), USA                                                                | GFDL-CM3          |
|                                                                                                                                                                         | GFDL-ESM2G        |
|                                                                                                                                                                         | GFDL-ESM2M        |
| National Aeronautics and Space Administration (NASA)/Goddard Institute for Space Studies (GISS), USA                                                                    | GISS-E2-R         |
|                                                                                                                                                                         | GISS-E2-R-CC      |
| Met office Hadley Center, UK                                                                                                                                            | HadGEM2-AO        |
|                                                                                                                                                                         | HadGEM2-CC        |
|                                                                                                                                                                         | HadGEM2-ES        |
| Center for Climate System Research (University of Tokyo), National Institute for Environmental Studies, and Frontier Research Center for Global Change (JAMSTEC), Japan | MIROC-ESM         |
|                                                                                                                                                                         | MIROC-ESM-CHEM    |
